# Supplementary material for: Exploring the interactions between vulnerability, resilience and adaptation to extreme temperatures
Source: Research Square preprint supplement (doi:10.21203/rs.3.rs-259270/v1), 2021-03-03
Supplement: Supplementary file 1 [file 40e19ab7e37c0cdde9c85cd3.docx]

# Cold-related vulnerability and resilience

| Participants | Overall Cold Vulnerability | Cold-related Resilience |
| --- | --- | --- |
| AM (65) | High | Low |
| AF (79) | High | Low |
| BF (80) | High | Low |
| CF (87) | NA | NA |
| DF (76) | NA | NA |
| EF (81) | High | Low |
| FF (80) | Low | High |
| BM (75) | High | Low |
| GF (69) | High | High |
| CM (68) | High | Low |
| HF (65) | High | Low |
| IF (73) | High | Low |
| JF (83) | High | Low |
| KF (65) | High | Low |
| LF (71) | High | Low |
| DM (83) | High | Low |
| EM (78) | NA | NA |
| MF (82) | Low | High |
| NF (65) | NA | NA |
| FM (95) | Low | High |
| GM (69) | High | High |
| HM (87) | NA | NA |
| IM (76) | Low | High |
| OF (72) | Low | High |
| PF (76) | High | High |
| QF (74) | High | High |
| RF (79) | High | High |
| SF (75) | High | High |
| TF (70) | Low | High |
| UF (70) | High | Low |
| VF (76) | NA | NA |
| JM (80) | Low | High |
| XF (80) | High | High |
| KM (65) | Low | High |
| ZF (79) | Low | High |
| AAF (75) | High | High |
| LM (65) | Low | High |
| BBF (74) | Low | High |
| CCF (78) | High | High |
| MM (85) | High | High |
| DDF (65) | Low | High |
| NM (69) | High | Low |
| EEF (72) | High | Low |
| FFF (84) | High | Low |
| GGF (84) | High | Low |
| OM (65) | High | Low |
| HHF (76) | High | Low |
| IIF (87) | High | Low |
| JJF (77) | High | Low |
| PM (65) | High | Low |
| KKF (71) | High | Low |
| QM (65) | High | Low |
